# Supplementary material for: An Efficient Marker Gene Excision Strategy Based on CRISPR/Cas9-Mediated Homology-Directed Repair in Rice
Source: MDPI journal article supplement (doi:10.3390/ijms23031588), 2022-01-29
Supplement: s1 [file s1]

# Supplemental information

An efficient marker gene excision strategy based on CRISPR/Cas9-mediated homology-directed repair in rice

Jiantao Tan<sup>1, 2, 3</sup>, Yaxi Wang<sup>1, 3</sup>, Shuifu Chen<sup>1, 3</sup>, Zhansheng Lin<sup>1, 3</sup>, Yanchang Zhao<sup>1, 3</sup>, Yang Xue<sup>1, 3</sup>, Yuyu Luo<sup>1, 3</sup>, Yao-Guang Liu<sup>1, 2, 3</sup>, Qinlong Zhu<sup>1, 2, 3\*</sup>

<sup>1</sup> State Key Laboratory for Conservation and Utilization of Subtropical Agro-Bioresources, South China Agricultural University, Guangzhou 510642, China; tjt@scau.edu.cn (J. T.); wangyx7890@stu.scau.edu.cn (Y. W.); chenshuifu2021@126.com (S. C.); linzhansheng@stu.scau.edu.cn (Z. L.); 18320724774@stu.scau.edu.cn (Y.Z.); xueyang@stu.scau.edu.cn (Y. X.); luoyuyu@stu.scau.edu.cn (Y.L.); ygliu@scau.edu.cn (Y-G. L.); zhuql@scau.edu.cn (Q.Z.)

<sup>2</sup> Guangdong Laboratory for Lingnan Modern Agriculture, Guangzhou 510642, China

<sup>3</sup> College of Life Sciences, South China Agricultural University, Guangzhou 510642, China

\* Correspondence: Correspondence: zhuql@scau.edu.cn

Figure S1. *OsSRABB* expresses in several tissues, but no in callus.

Figure S2. *OsSRABB* highly expresses in meristem and inflorescences.

Figure S3. Nucleotide sequences encoding the separated GUS reporter, TS1, TS2 and MCS region sequences.

Figure S4. Detection of the *Cas9* expression cassette in pYLP*ssi::Cas9* transgenic plant genome.

Figure S5. CRISPR/Cas9-mediated HDR allows for precise excision and seamless integration of DNA.

Table S1. List of primer used in this study.

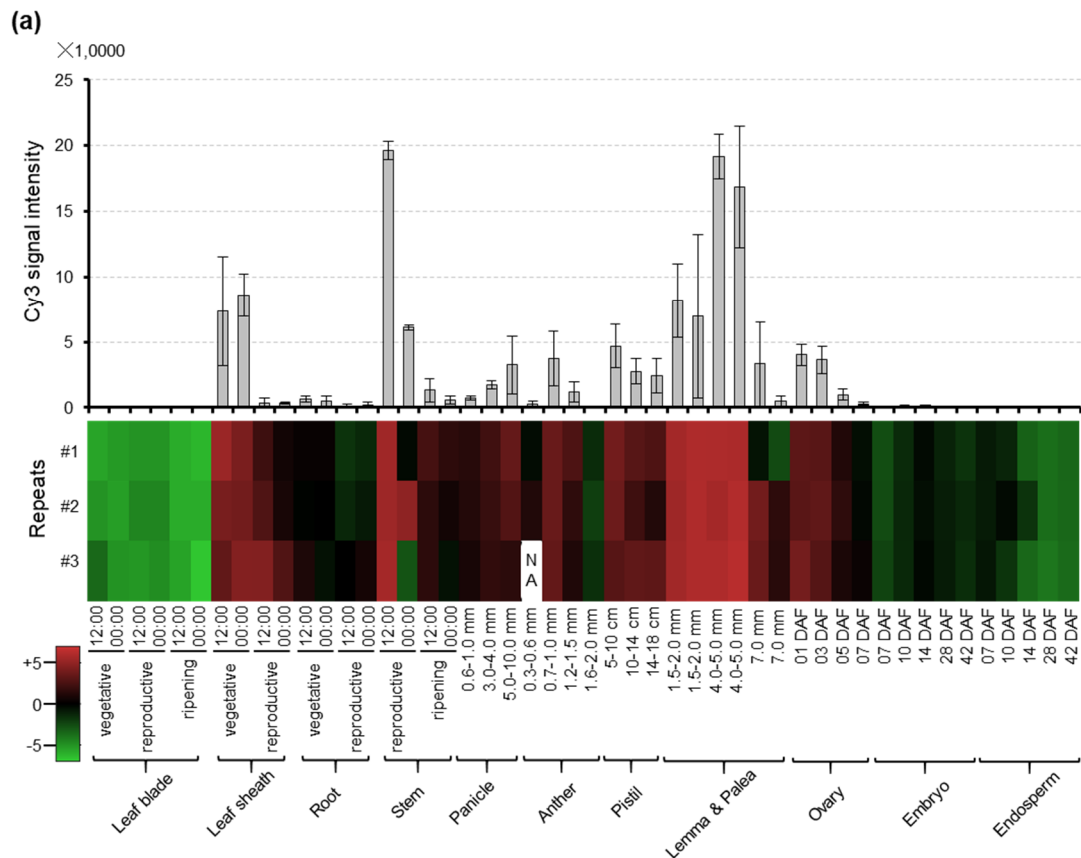

(b)

| Developmental Stage                                                 | Target Cell Type   | 0 6510 1,3020 1,9530 2,6040 3,2550 | 0 6510 1,3020 1,9530 2,6040 3,2550 | 0 6510 1,3020 1,9530 2,6040 3,2550 | Expression Intensity |
|---------------------------------------------------------------------|--------------------|------------------------------------|------------------------------------|------------------------------------|----------------------|
| 15 days after induction, treatment 3                                | calli              |                                    | NA                                 |                                    | NA                   |
| 15 days after induction, treatment 2                                | calli              |                                    | NA                                 |                                    | NA                   |
| 15 days after subculture                                            | calli              |                                    | NA                                 |                                    | NA                   |
| Just before infection                                               | calli              |                                    | NA                                 |                                    | NA                   |
| 1 h after infection                                                 | calli              |                                    | NA                                 |                                    | NA                   |
| 6 h after infection                                                 | calli              |                                    | NA                                 |                                    | NA                   |
| Screening stage                                                     | calli              |                                    | NA                                 |                                    | NA                   |
| 5 days after regeneration                                           | calli              |                                    | NA                                 |                                    | NA                   |
| 48 h after emergence, light                                         | plumule            |                                    | NA                                 |                                    | NA                   |
| 48 h after emergence, light                                         | radicle            |                                    | NA                                 |                                    | NA                   |
| 48 h after emergence, dark                                          | plumule            |                                    | NA                                 |                                    | NA                   |
| 48 h after emergence, dark                                          | radicle            |                                    | NA                                 |                                    | NA                   |
| Germination (72 h after imbibition)                                 | seed               |                                    | NA                                 |                                    | NA                   |
| Trefoil stage, mixture of 5, 15, 30, 60 min after treating with KT  | seedling           |                                    | NA                                 |                                    | NA                   |
| Trefoil stage, mixture of 5, 15, 30, 60 min after treating with GA3 | seedling           |                                    | NA                                 |                                    | NA                   |
| Stage of three days after germination                               | embryo and radicle |                                    | NA                                 |                                    | NA                   |
| Trefoil stage, mixture of 5, 15, 30, 60 min after treating with NAA | seedling           |                                    | NA                                 |                                    | NA                   |
| Three-leaf stage                                                    | leaf and root      |                                    | NA                                 |                                    | NA                   |
| Seedling with 2 tillers                                             | root               |                                    | NA                                 |                                    | NA                   |
| Seedling with 2 tillers                                             | shoot              |                                    | NA                                 |                                    | NA                   |
| Seedling with 2 tillers                                             | leaf               |                                    | NA                                 |                                    | NA                   |
| Secondary-branch primordium differentiation stage (stage 3)         | sheath             |                                    | NA                                 |                                    | NA                   |
| Secondary-branch primordium differentiation stage (stage 3)         | young panicle      |                                    | NA                                 |                                    | NA                   |
| Pistil and stamen primordium differentiation stage (stage 4)        | young panicle      |                                    | NA                                 |                                    | NA                   |
| Pollen-mother cell formation stage (stage 5)                        | young panicle      |                                    | NA                                 |                                    | NA                   |
| 5 days before heading                                               | flag leaf          |                                    | NA                                 |                                    | NA                   |
| 5 days before heading                                               | stem               |                                    | NA                                 |                                    | NA                   |
| 5 days before heading                                               | leaf               |                                    | NA                                 |                                    | NA                   |
| 4-5 cm young panicle                                                | sheath             |                                    | NA                                 |                                    | NA                   |
| 4-5 cm young panicle                                                | young panicle      |                                    | NA                                 |                                    | NA                   |
| Heading stage                                                       | panicle            |                                    | NA                                 |                                    | NA                   |
| Heading stage                                                       | stem               |                                    | NA                                 |                                    | NA                   |

**Figure S1. *OsSRABB* expresses in several tissues, but no in callus. (a, b) Heatmap and ranges of expression of *OsSRABB*.** The expression profile for *OsSRABB* in various tissues and organs (including different developmental stages and times of day) is shown as raw data representing the Agilent one-color (Cy3) signal intensity (a, b) and normalized data (log2) (a) from RiceXpro and CREP. Green indicates low transcript levels, and red indicates high transcript levels. NA, not available.

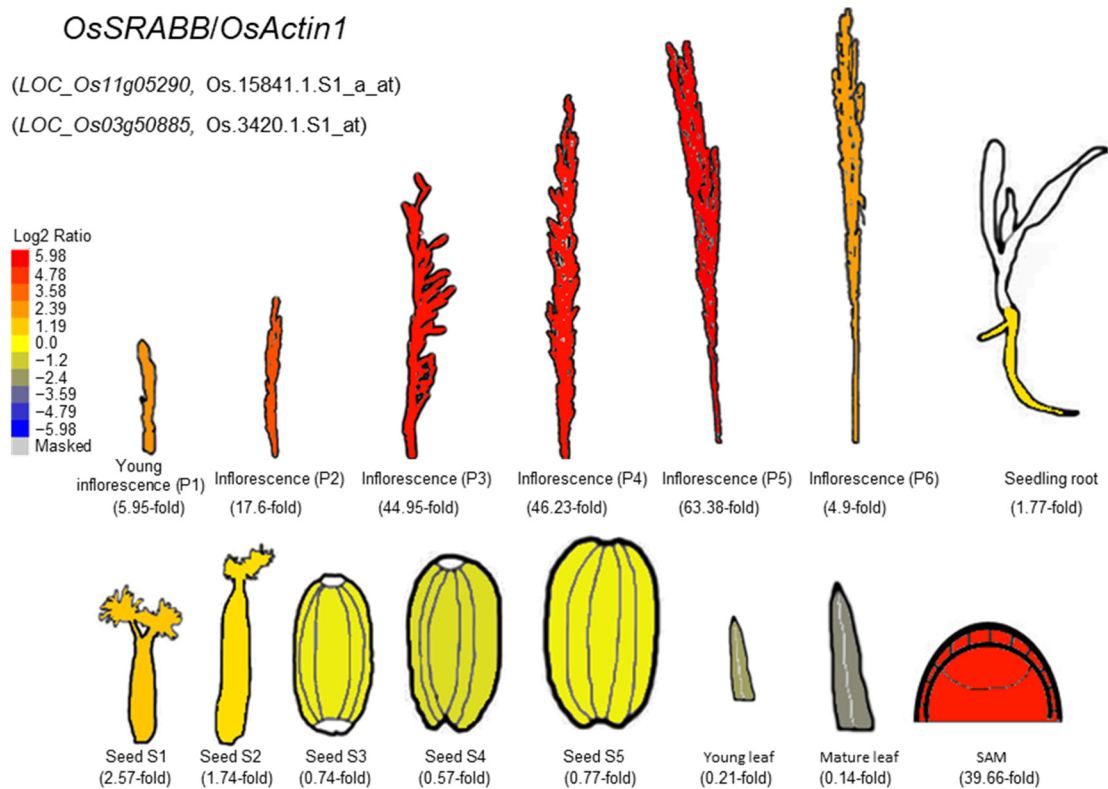

**Figure S2. *OsSRABB* highly expresses in meristem and inflorescences.** The relative expression levels of *OsSRABB* (*LOC\_Os11g05290*) compared with reference gene *OsActin1* (*LOC\_Os03g50885*) in meristem (SAM), inflorescences, seeds, leaves and seedling root are shown as normalized data (log2) from Rice eFP Browser. Blue indicates low transcript levels, and red indicates high transcript levels.

Color codes:

G, U, S, TS1, TS2

GUS

ATG GTAGATCTGAGGGTAAATTTCTAGTTTTCTCCTTCATTTCTTGGTTAGGACCCTTTCTCTTTTATTTTTTTGAGCTTTGA  
TCTTTCTTTAAACTGATCTATTTTTTAATTGATTGGTTATGGTGTAAATATTACATAGCTTTAACTGATAATCTGATTACTTTATTT  
CGTGTGTCTATGATGATGATGATAGTTACAGAACCGACGAACTAGTCTGTACCCGATCAACACCGAGACCCGTGGCGTCTTCGACCT  
CAATGGCGTCTGGAACCTCAAGCTGGACTACGGGAAAGGACTGGAAGAGAAGTGGTACGAAAGCAAGCTGACCGACACTATTAGTAT  
GGCCGTCCCAAGCAGTTACAATGACATTGGCGTGACCAAGGAAATCCGCAACCATATCGGATATGTCCTGGTACGAACGTGAGTTCAC  
GGTGCCGGCCTATCTGAAGGATCAGCGTATCGTGCTCCGCTTCGGCTCTGCAACTCACAAAGCAATTGTCTATGTCAATGGTGAGCT  
GGTCGTGGAGCACAAGGGCGGATTCCCTGCCATTGGAAGCGGAAATCAACAACCTCGCTGCGTGATGGCATGAATCGCGTCACCGTCGC  
CGTGGACAACATCCTCGACGATAGCACCTCCCGGTGGGGCTGTACAGCGAGCGCCACGAAGAGGGCCTCGGAAAAGTCATTTCGTAA  
CAAGCCGAACCTTCGACTTCTTCAACTATGCAGGCCTGCACCGTCCGGTGAAAATCTACACGACCCCGTTTACGTACGTCGAGGACAT  
CTCGGTTGTGACCGACTTCAATGGCCCAACCGGGACTGTGACCTATACGGTGGACTTTCAAGGCAAAGCCGAGACCGTGAAAGTGTC  
GGTCGTGGATGAGGAAGGCAAAGTGGTCGCAAGCACCGAGGGCCTGAGCGGTAACGTGGAGATTCGGAATGTCATCCTCTGGGAACC  
ACTGAACACGTATCTCTACCAGATCAAAGTGGAACTGGTGAACGACGGACTGACCATCGATGTCTATGAAGAGCCGTTCGGCGTGCG  
GACCGTGGAAGTCAACGACGGCAAGTTCCTCATCAACAACAAACCGTTCTACTTCAAGGGCTTTGGCAAACATGAGGACACTCCTAT  
CAACGGCCGTGGCTTTAACGAAGCGAGCAATGTGATGGATTTCATATCCTCAAATGGATCGGCGCCAACAGCTTCCGGACCGCACA  
CTATCCGTAATCTGAAGAGTTGATGCGTCTTGCGGATCGCGAGGGTCTGGTCTGTATCGACGAGACTCCGGCAGTTGGCGTGCACCT  
CAACTTCATGGCCACCACGGGACTCGGCGAAGGCAGCGAGCGCTCAGTACCTGGGAGAAGATTCGGACGTTTGAGACCATCAAGA  
CGTTCTCCGTGAACTGGTGTCTCGTGACAAGAACCATCCAAGCGTCGTGATGTGGAGCATCGCCAACGAGGCGGCGACTGAGGAAGA  
GGGCGGTACGAGTACTTCAAGCCGTTGGTGGAGCTGACCAAGGAACCTCGACCCACAGAAGCGTCCGGTCACGATCGTGCTGTTTGT  
GATGGCTACCCCGGAGACGGACAAAGTCGCCGAACCTGATTGACGTCATCGCGCTCAATCGCTATAACGGATGGTACTTCGATGGCG  
TGATCTCGAAGCGGCCAAAGTCCATCTCCGCCAGGAATTTACGCGTGGAACAAGCGTTGCCAGGAAAGCCGATCATGATCACTGA  
GTACGGCGCAGACACCGTTGCGGGCTTTCACGACATTGATCCAGTGATGTTACCGAGGAATATCAAGTCGAGTACTACCAGGCGAA  
CCACGTCGTGTTTCGATGAGTTTGAGAACTTCGTGGGTGAGCAAGCGTGGAACCTTCGCGGACTTCGCGACCTCTCAGGGCGTGATGCG  
CGTCCAAGGAAACAAGAAGGGCGTGTTCACTCGTGACCGCAAGCCGAAGCTCGCCGCGCACGTCTTTCGCGAGCGCTGGACCAACAT  
TCCAGATTTCCGCTACAAGAACGCTAGCCATCACCATCACCATCACGTGTGA

TS1 and TS2

CCA **CCTGGGATTGGAGTCACAGT** ATGCTACAGACA **GTGATAGTGCCACTCACAAGAGG**

MCS region

AATTAAGTGCAGATCCAGGCCGGCCATAAGCTTTGAGCTCTAAGGCGCGCCTATTTAAATACCTGCAGGT  
Asc I Sbf I

TTAATTAAGAACGCGTT CAGTTTAAAC TAAATTA  
Pac I Pme I

Figure S3. Nucleotide sequences encoding the separated GUS reporter, TS1, TS2 and MCS region sequences. The protospacer-adjacent motifs (PAMs) of TS1 and TS2 are indicated in red. The available MCSs are marked by underlines.

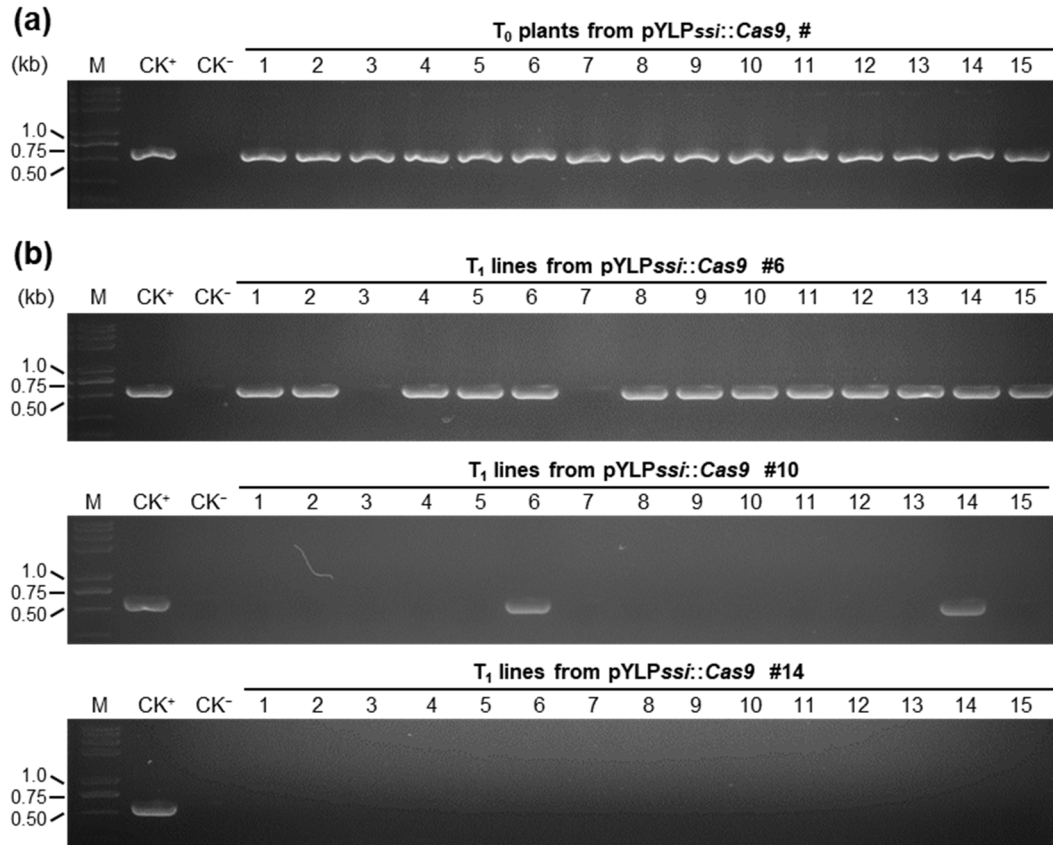

**Figure S4. Detection of the *Cas9* expression cassette in pYLPssi::*Cas9* transgenic plant genome.** (a, b) PCR using the *Cas9*-F/*Cas9*-R primers to detect the *Cas9* expression cassette in pYLPssi::*Cas9* T<sub>0</sub> (a) and T<sub>1</sub> (b) plants related to Figure 2 and 4. Only when there was still *Cas9* fragment present in the transgenic plant genome, one 608-bp specific product would be generated by *Cas9*-F/*Cas9*-R. Otherwise, no any bands would be amplified in the fully excision plants [such as #1 plant (T<sub>1</sub>) generated from pYLPssi::*Cas9* #10 (T<sub>0</sub>)] and plants without transgene [such as #8 plant (T<sub>1</sub>) generated from pYLPssi::*Cas9* #10 (T<sub>0</sub>)]. CK<sup>+</sup>, the pYLPssi::*Cas9* construct; CK<sup>-</sup>, ZH11 plants without T-DNA.

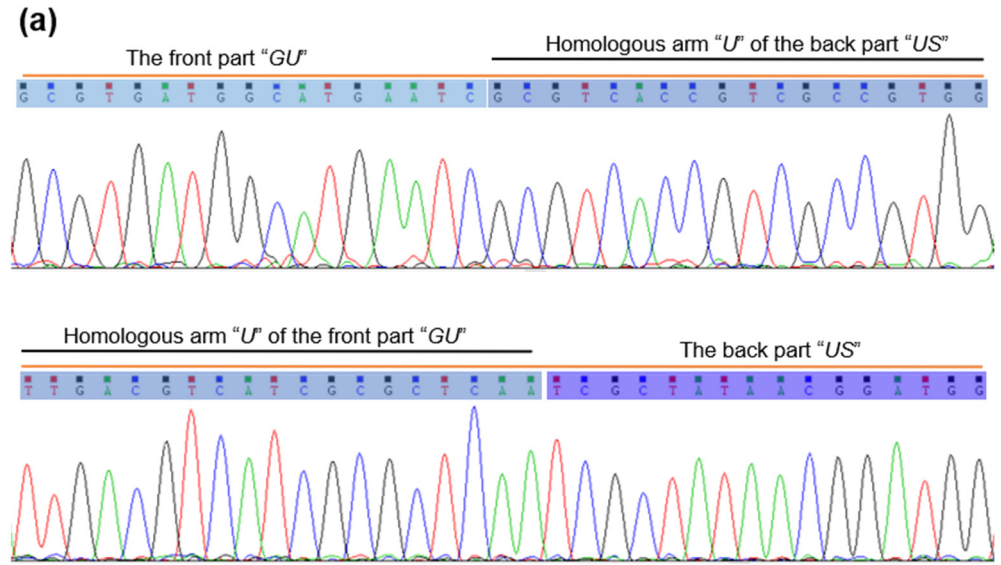

(b) T<sub>1</sub> plants separated from pYLPssi::Cas9 #10 (P<sub>35S</sub>::GUS)

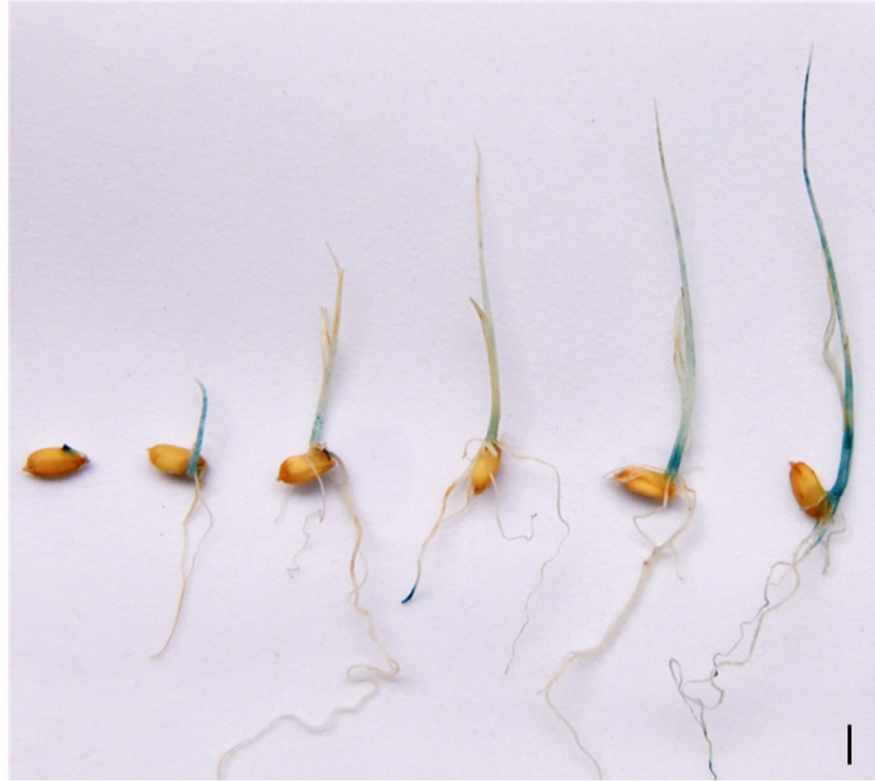

**Figure S5. CRISPR/Cas9-mediated HDR allows for precise excision and seamless integration of DNA.** (a) Sanger sequencing of the recombinant products amplified from pYLPssi::Cas9 T<sub>1</sub> lines using GU-F and US-R primers. (b) GUS reporter-aided analysis for T<sub>1</sub> seedlings of pYLPssi::Cas9#10 line (P<sub>35S</sub>::GUS). Bar = 0.5 cm.

**Table S1.** List of primer used in this study.

| Primers | Sequence (5'-3')                                                                                                     | Purpose                                   |
|---------|----------------------------------------------------------------------------------------------------------------------|-------------------------------------------|
| I-1-FU1 | ATCCATTCTCAGGCTGTCTCGTCTCGTCTCTTCCCAACAGTTGCGCAGCCTG                                                                 | Generating P <sub>35S</sub> linking "GU". |
| I-1-R1  | ACTGTGACTCCAATCCCAGG <b>TGG</b> TTGAGCGGATGACGTCAATC                                                                 |                                           |
| I-1-R2  | GGCACTATCACTGTCTGTAGCATACTGTGACTCCAATCCCAGG <b>TGG</b>                                                               |                                           |
| I-2-F1  | GTGATAGTGCCACTCACAAG <b>AGG</b> TAATTCGGGGATCTGGATTTTAGTAC<br>GGAGTCACAGTATGCTACAGACAGTGATAGTGCCACTCACAAG <b>AGG</b> | Fusing TS1 and TS2                        |



|                                                  |                                                                                                                                                                                                                                               |                                                                                       |
|--------------------------------------------------|-----------------------------------------------------------------------------------------------------------------------------------------------------------------------------------------------------------------------------------------------|---------------------------------------------------------------------------------------|
| I-2-F2<br>I-2-R                                  | <u>GTTGTCTTACTATTGCTGGCAGGAGGTCAGGCGTATTGGCTAGAGCAGCTTG</u>                                                                                                                                                                                   | to the 5' end of <i>HPT</i> expression cassette.                                      |
| U-F<br>RU3T1<br>RU6aT2<br>gRNA-R<br>FgT1<br>FgT2 | CTCCGTTTTACCTGTGGAATCG<br>CCTGGGATTGGAGTCACAGTGCCACGGATCATCTGCACAACTC<br>CTTGTGAGTGGCACTATCACGGCAGCCAAGCCAGCACC<br>CGGAGGAAAATTCCATCCAC<br>ACTGTGACTCCAATCCCAGGGTTTTAGAGCTAGAAATAGC<br>GTGATAGTGCCACTCACAAGGTTTTAGAGCTAGAAATAGC               | Generating<br><i>OsU3::T1</i> -gRNA and<br><i>OsU6::T2</i> -gRNA.                     |
| Up-GA-T4<br>gR-GA-T4<br>Up-GA-T5<br>gR-GA-T1     | <u>GCCAGCAATAGTAAGACAACACGCAAAGTCGTGGAATCGGCAGCAAAGG</u><br><u>CTTGAGTGAGGTTGTAAAGGGAGTTGGCTCCATCCACTCCAAGCTCTTG</u><br><u>CCTTTACAACCTCACTCAAGTCCGTTAGAGGTGGAATCGGCAGCAAAGG</u><br><u>TGCGTTTGTTCGCTCTACGAACTCCCAGCCATCCACTCCAAGCTCTTG</u>   | Fusing <i>OsU3::T1</i> -<br>gRNA and<br><i>OsU6::T2</i> -gRNA to<br>pCAMBIA1300.      |
| II-FU2<br>II-RU3-1<br>II-RU3-2<br>II-RU3-3       | GGAAACAAACGCAGAATCCAAGCGCTGCCTTAGTTTTAGTAGAGTTGG<br>TGTCTGTAGCATACTGTGACTCCAATCCCAGG <b>TGG</b> CGATCTAGTAACATAGA<br>CAGTGCC <b>CCT</b> CTTGTGAGTGGCACTATCACTGTCTGTAGCATACTGTGACTCC<br><u>GTTTCCAGTGCGATTGAGGACCTTCAGTGCC<b>CCT</b>CTTGTG</u> | Fusing <i>Pssi::SpCas9</i><br>expression cassette<br>to the 5' end of TS1<br>and TS2. |
| III-FU3<br>III-RU3                               | <u>CCTCAATCGCACTGGAAACATCAAGGTCGGCGTCACCGTCGCCGTGGAC</u><br><u>GGAGTTGTGGTAATCTATGTATCCTGGTCCCGATCTAGTAACATAGATG</u>                                                                                                                          | Generating “ <i>US</i> ”.                                                             |
| GUS RT-F<br>GUS RT-R                             | GGTGAGCAAGCGTGGAACCTT<br>TGATGGTGATGGCTAGCGTT                                                                                                                                                                                                 | Analyzing the ex-<br>pression of<br><i>GUS</i> .                                      |
| Pm RT-F<br>Pm RT-R                               | CGGCGTGATGATGACGACAT<br>CTAAGCTACACCAGCTCAAC                                                                                                                                                                                                  | Analyzing the ex-<br>pression of<br><i>OsSRABB</i> .                                  |
| Cas9 RT-F<br>Cas9 RT-R                           | CAAGTACTTCGACACCACCATC<br>GGTGGCAGCAGGACGCTTAT                                                                                                                                                                                                | Analyzing the ex-<br>pression of<br><i>SpCas9</i> .                                   |
| UFC1 RT-F<br>UFC1 RT-R                           | GATGGCAAGACCCACAAG<br>TCCCGAACCTTGGGCAGT                                                                                                                                                                                                      | Analyzing the ex-<br>pression of<br><i>OsUFC1</i> .                                   |
| GU-F<br>T35S-R<br>US-R                           | TCAACAACCTCGCTGCGTGAT<br>GTCGGGCGTACACAAATCGC<br>CACCGCCATCGAAGTACCAT                                                                                                                                                                         | Detecting the HDR-<br>mediated marker<br>gene excision.                               |
| Cas9-F<br>Cas9-R                                 | TCCAAGTCCAGGCGTCTCGAG<br>AGCTCACCAAGGTGGATCTG                                                                                                                                                                                                 | Detecting the <i>Cas9</i><br>expression cassette<br>in plant genome.                  |

Note: The underlines represent the sequences paired with the vector for Gibson cloning. Bold letters represent the PAMs TS1 and TS2.
